# Supplementary material for: Engineering of hollow periodic mesoporous organosilica nanorods for augmented hydrogen clathrate formation
Source: Royal Society of Chemistry journal article supplement (doi:10.1039/d3ta05530b), 2023-01-01
Supplement: d3ta05530b1.pdf [file d3ta05530b1.pdf]

## Supporting Information

Engineering of hollow periodic mesoporous organosilica nanorods for augmented hydrogen clathrate formation

Geert Watson <sup>a,1</sup>, Nithin B. Kummamuru <sup>b,1</sup>, Sammy W. Verbruggen <sup>b,c</sup>, Patrice Perreault <sup>d,e</sup>, Maarten Houllberghs <sup>f</sup>, Johan Martens <sup>f</sup>, Eric Breynaert <sup>f</sup>, Pascal Van Der Voort <sup>a,\*</sup>

<sup>a</sup> Centre for Ordered Materials, Organometallics and Catalysis (COMOC), Department of Chemistry, Ghent University, Krijgslaan 281-S3, 9000 Ghent, Belgium.

<sup>b</sup> Sustainable Energy Air & Water Technology (DuEL), Department of Bioscience Engineering, University of Antwerp, Groenenborgerlaan 171, 2020 Antwerpen, Belgium.

<sup>c</sup> NANOlaboratory Center of Excellence, University of Antwerp, Groenenborgerlaan 171, 2020 Antwerpen, Belgium.

<sup>d</sup> Faculty of Science, Instituut voor Milieu & Duurzame Ontwikkeling (IMDO), University of Antwerp, Campus Groenenborger – Building V.612, Groenenborgerlaan 171, 2020 Antwerpen, Belgium.

<sup>e</sup> University of Antwerp, BlueApp, Olieweg 97, 2020 Antwerpen, Belgium.

<sup>f</sup> Centre for Surface Chemistry and Catalysis, NMRCoRe - NMR - XRAY - EM Platform for Convergence Research, Department of Microbial and Molecular Systems (M2S), KU Leuven, Celestijnenlaan 200F, 3001, Leuven, Belgium

Corresponding Author: [\\*pascal.vandervoort@ugent.be](mailto:pascal.vandervoort@ugent.be) Tel: +32 495 28 05 53

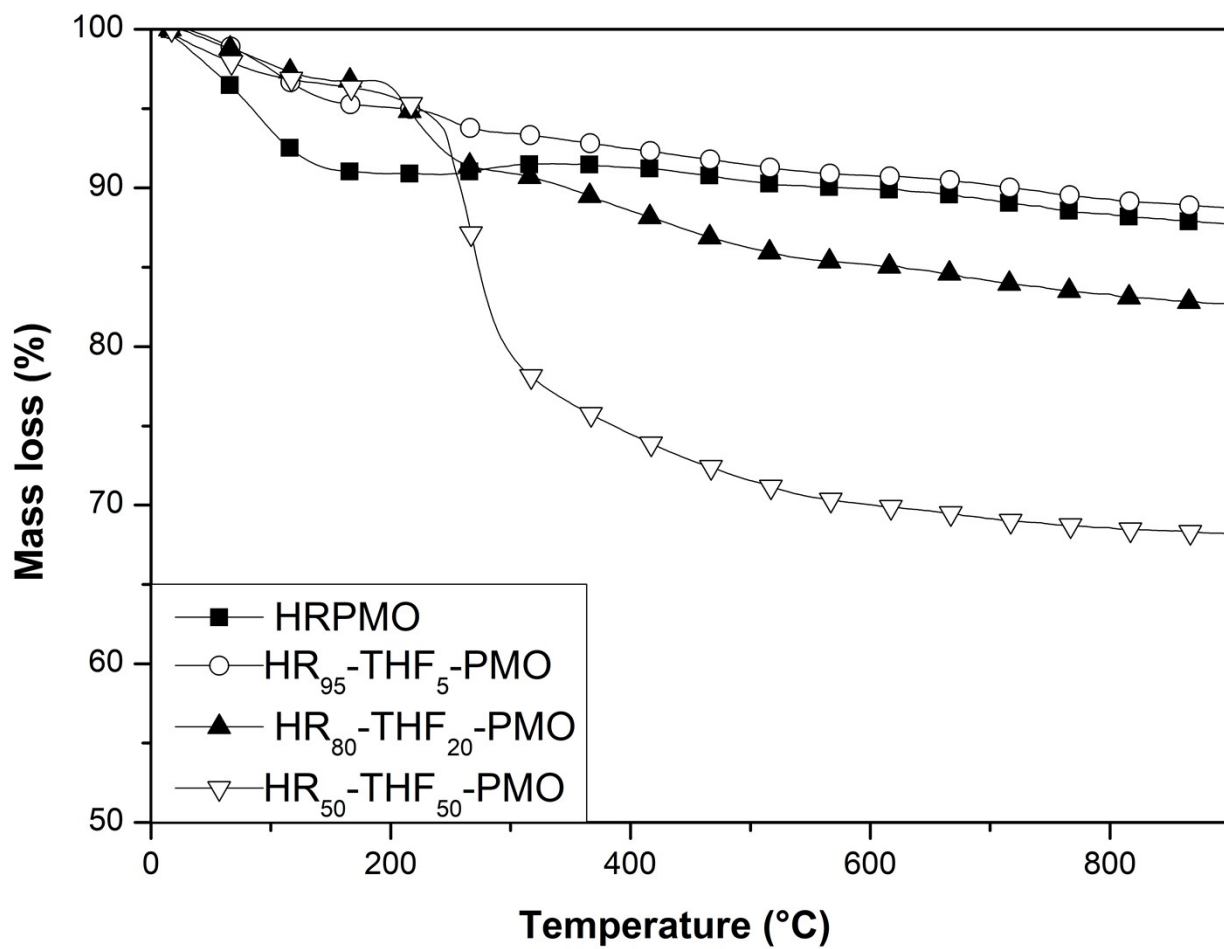

Figure S1. Thermogravimetric analysis of the different materials.

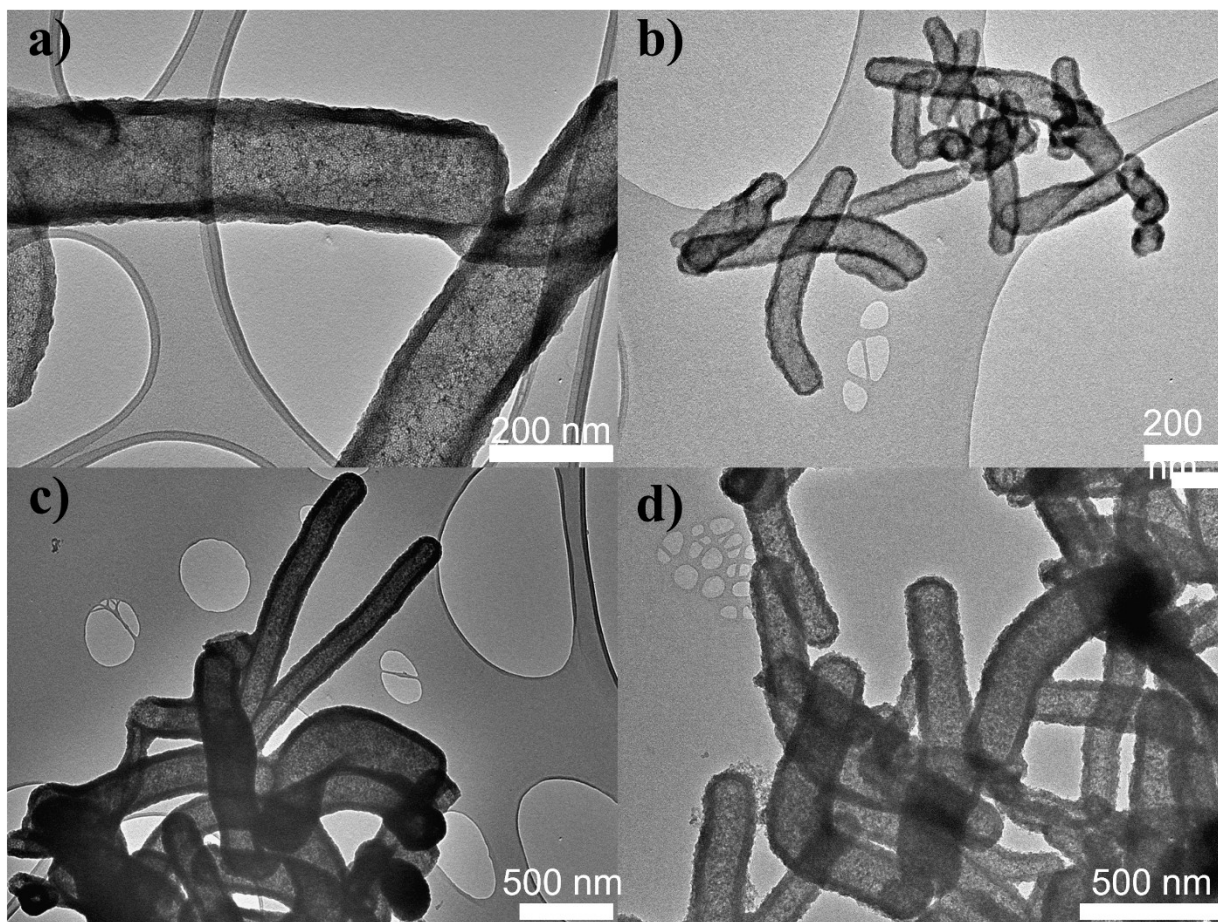

**Figure S2.** Transmission Electron Microscopy images of (a): HRP MO, (b): HR<sub>95</sub>-THF<sub>5</sub>-PMO, (c): HR<sub>80</sub>-THF<sub>20</sub>-PMO, (d): HR<sub>50</sub>-THF<sub>50</sub>-PMO

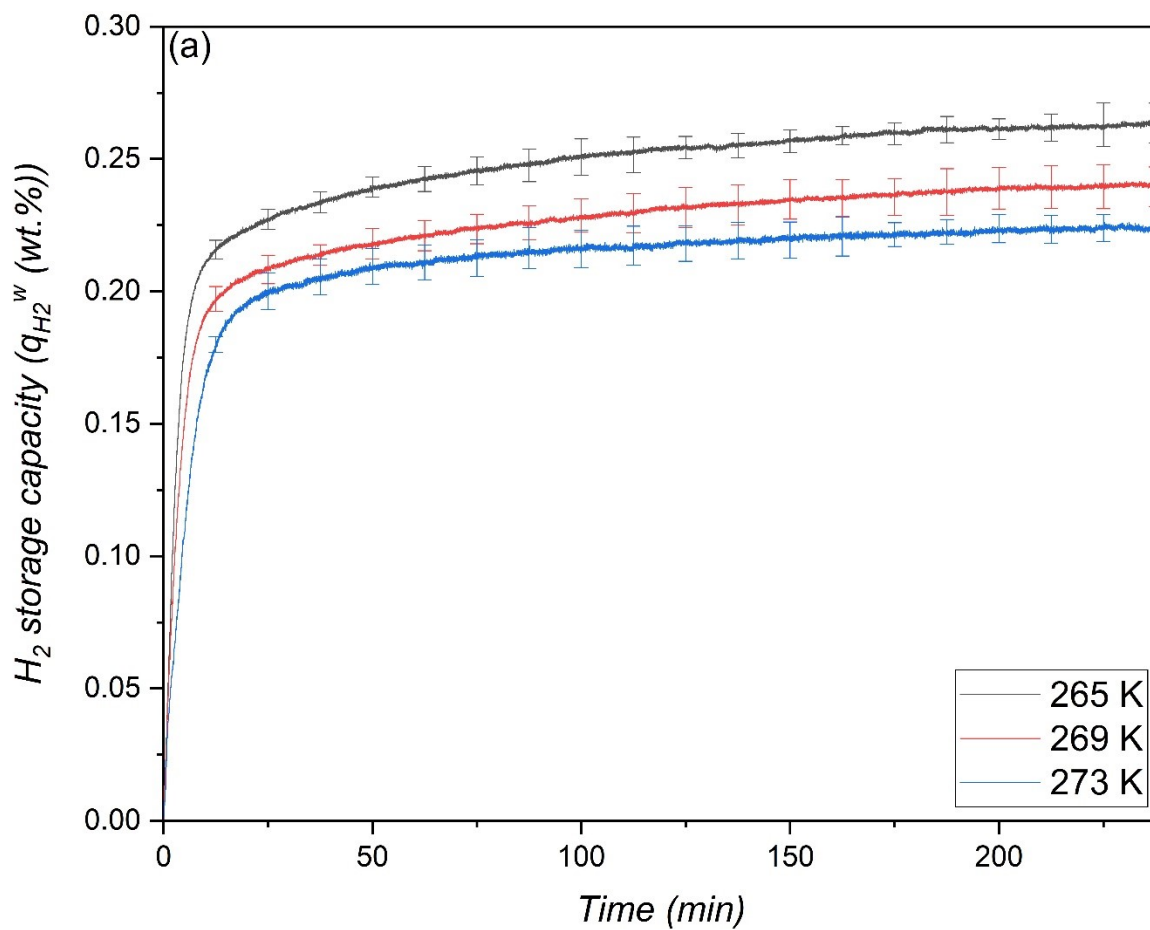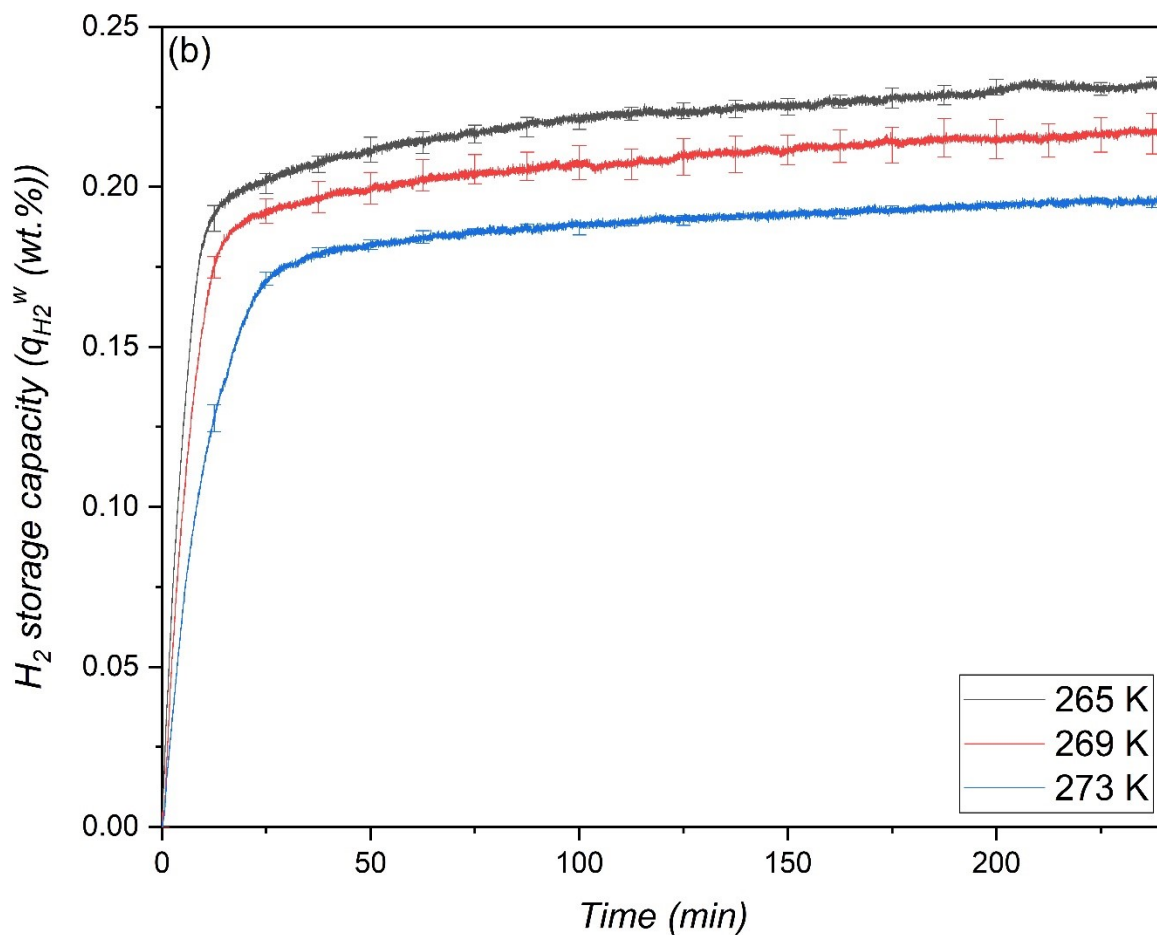

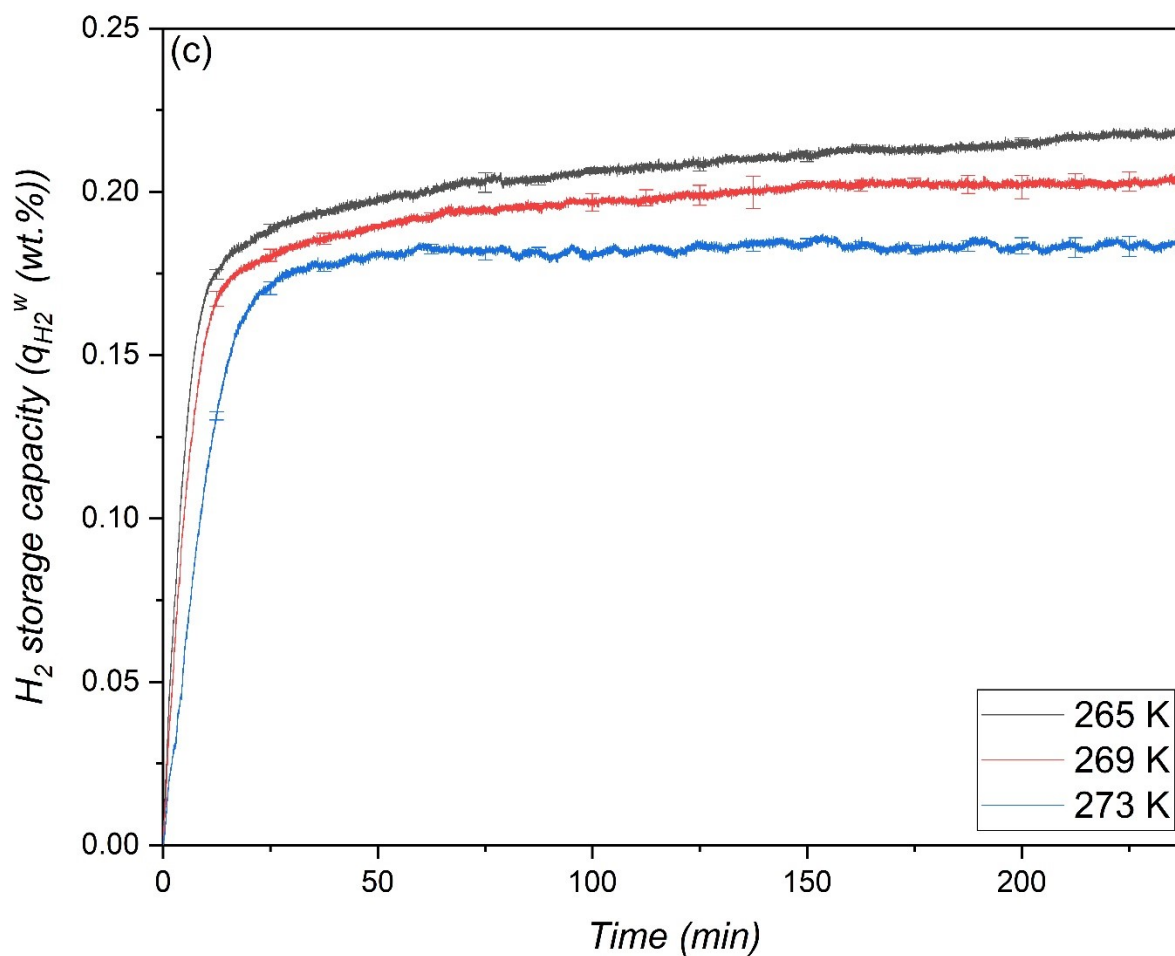

**Figure S3.** H<sub>2</sub> storage capacities in three different THF-like functionalized materials at three different temperatures; (a): HR<sub>95</sub>-THF<sub>5</sub>-PMO, (b): HR<sub>80</sub>-THF<sub>20</sub>-PMO, (c): HR<sub>50</sub>-THF<sub>50</sub>-PMO
